# Supplementary material for: Enhancing Algal Yield and Nutrient Removal from Anaerobic Digestion Piggery Effluent by an Integrated Process-Optimization Strategy of Fungal Decolorization and Microalgae Cultivation
Source: MDPI journal article supplement (doi:10.3390/app12094741), 2022-05-08
Supplement: s1 [file s1]

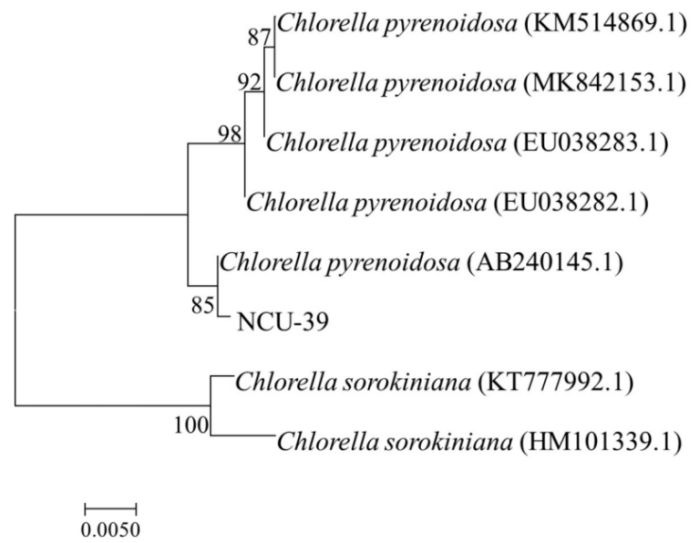

**Figure S1** Phylogenetic tree of NCU-39 and *Chlorella* genus based on 18S rRNA gene sequences.

GenBank accession number of each species is shown in parenthesis. Numbers at the nodes indicate bootstrap values (expressed as a%) with 1000 replicates and the scale bar measures the distance between species.

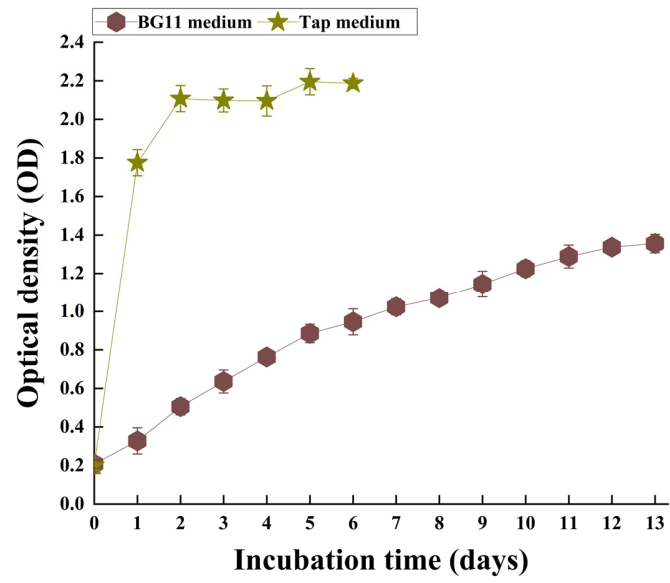

Figure S2 Growth curve of NCU-39 in BG11 and Tap medium. Error bars represent standard deviations (n = 3).

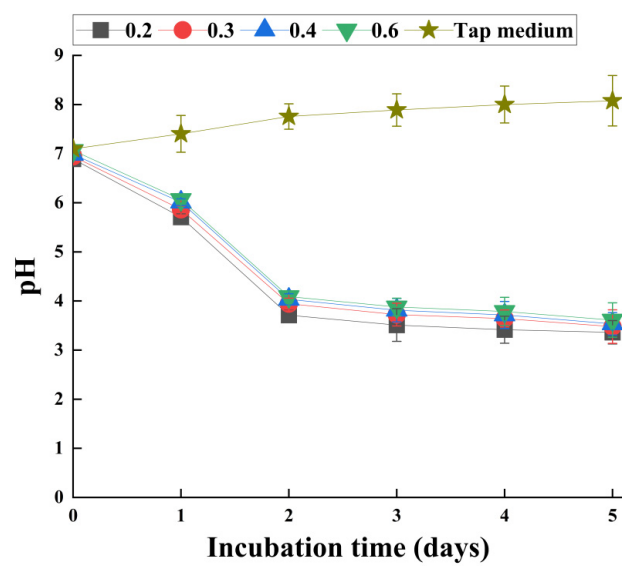

**Figure S3** pH levels at different initial optical densities (ODs) (OD values = 0.2, 0.3, 0.4 and 0.6) in 5-fold diluted anaerobic digestion piggery effluents (ADPEs) pretreated by 3-day fungal decolorization. Tap medium was used as a control. Error bars represent standard deviations ( $n = 3$ ).

**Table S1** Chemical composition of Rose Bengal medium.

| Chemicals                            | Concentration<br>(g L <sup>-1</sup> ) |
|--------------------------------------|---------------------------------------|
| Peptone                              | 5                                     |
| Glucose                              | 10                                    |
| KH <sub>2</sub> PO <sub>4</sub>      | 1                                     |
| MgSO <sub>4</sub> •7H <sub>2</sub> O | 0.5                                   |
| Agar                                 | 20                                    |
| Rose Bengal                          | 0.033                                 |
| Chloramphenicol                      | 0.1                                   |

**Table S2** Chemical composition of PDB medium.

| Chemicals     | Concentration        |
|---------------|----------------------|
|               | (g L <sup>-1</sup> ) |
| Potato powder | 5                    |
| Glucose       | 15                   |
| Peptone       | 10                   |
| NaCl          | 50                   |

**Table S3.** Homology among 18s rRNA gene sequences of NCU-39 and GenBank strains

| rRNA length (bp) | Database strain              | Genbank accession No. | Proximity (%) |
|------------------|------------------------------|-----------------------|---------------|
| 776              | <i>Chlorella pyrenoidosa</i> | AB240145.1            | 99.9          |
|                  | <i>Chlorella pyrenoidosa</i> | KM514869.1            | 99.0          |
|                  | <i>Chlorella pyrenoidosa</i> | MK842153.1            | 99.1          |
|                  | <i>Chlorella pyrenoidosa</i> | EU038283.1            | 99.1          |
|                  | <i>Chlorella pyrenoidosa</i> | EU038282.1            | 99.0          |
|                  | <i>Chlorella sorokiniana</i> | KT777992.1            | 95.8          |
|                  | <i>Chlorella sorokiniana</i> | HM101339.1            | 95.5          |

**Table S4** Chemical composition of Tap medium with 1 mL L<sup>-1</sup> of acetic acid.

| Chemicals                            | Concentration<br>(g L <sup>-1</sup> ) |
|--------------------------------------|---------------------------------------|
| Tris salt                            | 2.42                                  |
| NH <sub>4</sub> Cl                   | 15                                    |
| CaCl <sub>2</sub> •2H <sub>2</sub> O | 2                                     |
| MgSO <sub>4</sub> •7H <sub>2</sub> O | 4                                     |
| K <sub>2</sub> HPO <sub>4</sub>      | 0.028                                 |
| KH <sub>2</sub> PO <sub>4</sub>      | 0.014                                 |
| EDTA                                 | 0.2                                   |
| ZnSO <sub>4</sub> •7H <sub>2</sub> O | 0.22                                  |
| H <sub>3</sub> BO <sub>3</sub>       | 0.057                                 |
| MnCl <sub>2</sub> •4H <sub>2</sub> O | 0.101                                 |
| CoCl <sub>2</sub> •6H <sub>2</sub> O | 0.032                                 |
| CuSO <sub>4</sub> •5H <sub>2</sub> O | 0.031                                 |
| Ammonium molybdate                   | 0.022                                 |
| FeSO <sub>4</sub> •7H <sub>2</sub> O | 0.099                                 |
| pH                                   | 7.0                                   |

**Table S5** Chemical composition of BG11 medium

| Chemicals                                            | Concentration (mg L <sup>-1</sup> ) |
|------------------------------------------------------|-------------------------------------|
| NaNO <sub>3</sub>                                    | 1500                                |
| Na <sub>2</sub> CO <sub>3</sub>                      | 20                                  |
| MgSO <sub>4</sub> ·7H <sub>2</sub> O                 | 75                                  |
| CaCl <sub>2</sub> ·2H <sub>2</sub> O                 | 36                                  |
| K <sub>2</sub> HPO <sub>4</sub>                      | 40                                  |
| Citric Acid·H <sub>2</sub> O                         | 6                                   |
| Na <sub>2</sub> EDTA·2H <sub>2</sub> O               | 1                                   |
| Ferric Ammonium Citrate                              | 6                                   |
| H <sub>3</sub> BO <sub>3</sub>                       | 2.86                                |
| MnCl <sub>2</sub> ·4H <sub>2</sub> O                 | 1.81                                |
| ZnSO <sub>4</sub> ·7H <sub>2</sub> O                 | 0.22                                |
| Na <sub>2</sub> MoO <sub>4</sub> ·2H <sub>2</sub> O  | 0.39                                |
| CuSO <sub>4</sub> ·5H <sub>2</sub> O                 | 0.079                               |
| Co(NO <sub>3</sub> ) <sub>2</sub> ·6H <sub>2</sub> O | 0.0494                              |



**Table S6** Homology among 26s rRNA gene sequences of NU-27 and GenBank strains

| rDNA length (bp) | Database strain                  | Genbank accession | Proximity |
|------------------|----------------------------------|-------------------|-----------|
|                  |                                  | No.               | (%)       |
| 695              | <i>Lichtheimia ornata</i>        | MG772618.1        | 99.9%     |
|                  | <i>Lichtheimia ornata</i>        | MN166087.1        | 99.9%     |
|                  | <i>Lichtheimia ornata</i>        | MG772621.1        | 99.7%     |
|                  | <i>Lichtheimia ornata</i>        | JX961703.1        | 99.6%     |
|                  | <i>Lichtheimia ornata</i>        | MH870981.1        | 99.3%     |
|                  | <i>Lichtheimia corymbifera</i>   | MH866174.1        | 97.6%     |
|                  | <i>Lichtheimia ramosa</i>        | LR993205.1        | 95.0%     |
|                  | <i>Lichtheimia hongkongensis</i> | MN197701.1        | 94.6%     |
